# Supplementary material for: Hydroponic Ginseng ROOT Mediated with CMC Polymer-Coated Zinc Oxide Nanoparticles for Cellular Apoptosis via Downregulation of BCL-2 Gene Expression in A549 Lung Cancer Cell Line
Source: MDPI journal article supplement (doi:10.3390/molecules28020906), 2023-01-16
Supplement: s1 [file s1]

**Table S1.** Crystalline size of HGRCm-ZnONPs using Hydroponic Ginseng.

| Peak number | Peak position angle (2 $\theta$ ) | D spacing value (Å) | FWHM  | Size (nm) | Average size (nm) |
|-------------|-----------------------------------|---------------------|-------|-----------|-------------------|
| 100         | 31.82                             | 2.80                | .2145 | 28.13     | 28.87 nm          |
| 002         | 34.47                             | 2.59                | .2234 | 29.47     |                   |
| 101         | 36.31                             | 2.47                | .2228 | 29.01     |                   |
| 102         | 47.59                             | 1.90                | .4103 | 16.24     |                   |
| 110         | 56.66                             | 1.62                | .2436 | 23.56     |                   |
| 103         | 62.19                             | 1.47                | .4356 | 18.13     |                   |
| 200         | 66.46                             | 1.40                | .5127 | 19.20     |                   |

**Table S2.** IC<sub>50</sub> values of (Cisplatin, CMC, ZnO, HGR-Ex, HGR-ZnO-NPs, HGRCm- ZnO-NPs) against two cell lines.

| HaCaT (Normal Cell) | IC <sub>50</sub> with Standard Deviation (µg/mL) |             |             |             |                |
|---------------------|--------------------------------------------------|-------------|-------------|-------------|----------------|
|                     | CMC                                              | ZnO         | HGR-Ex      | HGR-ZnO-NPs | HGRCm- ZnO-NPs |
|                     | 240.19±3.09                                      | 199.41±3.13 | 121.96±4.19 | 59.42±4.42  | 52.56±2.21     |

| A549 (Lung Cancer Cell) | IC <sub>50</sub> with Standard Deviation (µg/mL) |            |             |             |             |                |
|-------------------------|--------------------------------------------------|------------|-------------|-------------|-------------|----------------|
|                         | Cisplatin                                        | CMC        | ZnO         | HGR-Ex      | HGR-ZnO-NPs | HGRCm- ZnO-NPs |
|                         | 23.64±3.62                                       | 55.31±2.77 | 139.11±4.96 | 129.57±2.09 | 39.22±3.04  | 15.74±2.05     |
